# Supplementary material for: (±)-Pheharmines A–B, two pairs of racemic alkaloids with a morpholino[4,3,2-hi]β-carboline core, from the roots of Peganum harmala
Source: Royal Society of Chemistry journal article supplement (doi:10.1039/d2ob01608g), 2022-01-01
Supplement: d2ob01608g1.pdf [file d2ob01608g1.pdf]

## Supporting Information

(±)-Pheharmines A-B, two pairs of racemic alkaloids with a morpholino[4,3,2-*hi*] $\beta$ -carboline core, from the roots of *Peganum harmala*

Sheng-Ge Li,<sup>a,b</sup> Xu Hu,<sup>a,b</sup> Qin Zhang,<sup>a</sup> Yan-Hui Zan,<sup>a</sup> Kai-Bo Wang,<sup>a</sup> Chun-Yu Jiang,<sup>a</sup> Jing-Jing Xue,<sup>a</sup> Yong-Xiang Liu,<sup>c</sup> Bin Lin,<sup>d</sup> Yong-Kui Jing,<sup>c</sup> Da-Hong Li,<sup>a,\*</sup> and Hui-Ming Hua<sup>a,\*</sup>

<sup>a</sup> Key Laboratory of Structure-Based Drug Design & Discovery, Ministry of Education, Shenyang Pharmaceutical University, Shenyang 110016, P. R. China

<sup>b</sup> Henan Key Laboratory of Zhang Zhongjing Formulate and Herbs for Immunoregulation, Zhang Zhongjing Traditional School of Chinese Medicine of Nanyang Institute of Technology, Nanyang 473004, P. R. China

<sup>c</sup> Wuya college of Innovation, Shenyang Pharmaceutical University, Shenyang 110016, P. R. China

<sup>d</sup> School of Pharmaceutical Engineering, Liaoning Province, Shenyang Pharmaceutical University, Shenyang 110016, P. R. China

\*Corresponding author

Hui-Ming Hua: huimhua@163.com

Da-Hong Li: lidahong0203@163.com

| <b>Contents</b>                                                                                                                                                                                                        | <b>Page</b> |
|------------------------------------------------------------------------------------------------------------------------------------------------------------------------------------------------------------------------|-------------|
| <b>1 Experimental section</b>                                                                                                                                                                                          | S3          |
| HPLC analyses of the crude ethanol extracts of different parts of <i>P. harmala</i>                                                                                                                                    | S3          |
| <b>Figure S1</b> HPLC chromatogram of the ethanolic extracts of aerial parts, roots, and seeds of <i>P. harmala</i>                                                                                                    | S3          |
| <b>2 Computational methods</b>                                                                                                                                                                                         | S4          |
| <b>Table S1</b> Gibbs free energy changes <sup>a</sup> and equilibrium populations <sup>b</sup> of B3LYP/6-31G(d) optimized low-energy 3D conformers of (7' <i>S</i> ,8' <i>S</i> )-pheharmine A in ECD calculations   | S4          |
| <b>Table S2</b> Cartesian coordinates for the low-energy 3D conformers of (7' <i>S</i> ,8' <i>S</i> )-pheharmine A at the B3LYP/6-31G(d) level of theory in methanol.                                                  | S6          |
| <b>Table S3</b> Gibbs free energies changes <sup>a</sup> and equilibrium populations <sup>b</sup> of B3LYP/6-31G(d) optimized low-energy 3D conformers of (7' <i>S</i> ,8' <i>R</i> )-pheharmine B in ECD calculations | S11         |
| <b>Table S4</b> Cartesian coordinates for the low-energy 3D conformers of (7' <i>S</i> ,8' <i>S</i> )-pheharmine B at the B3LYP/6-31G(d) level of theory in methanol.                                                  | S13         |
| <b>References</b>                                                                                                                                                                                                      | S19         |
| <b>3 NMR, HRESIMS, UV, HPLC, and ECD spectra</b>                                                                                                                                                                       | S20         |
| <b>Spectra of pheharmine A</b>                                                                                                                                                                                         | S20         |
| <b>Figures S2-S7</b> 1D and 2D NMR spectra of pheharmine A in DMSO- <i>d</i> <sub>6</sub>                                                                                                                              | S20         |
| <b>Figure S8</b> HRESIMS spectrum of pheharmine A                                                                                                                                                                      | S23         |
| <b>Figure S9</b> UV spectrum of pheharmine A in MeOH                                                                                                                                                                   | S24         |
| <b>Figure S10</b> Chiral HPLC separation profile of <b>1/2</b>                                                                                                                                                         | S24         |
| <b>Figures S11-S12</b> Experimental ECD spectra of (±)-pheharmine A ( <b>1-2</b> ) in MeOH                                                                                                                             | S25         |
| <b>Spectra of pheharmine B</b>                                                                                                                                                                                         | S26         |
| <b>Figures S13-S18</b> 1D and 2D NMR spectra of pheharmine B in DMSO- <i>d</i> <sub>6</sub>                                                                                                                            | S26         |
| <b>Figure S19</b> HRESIMS spectrum of pheharmine B                                                                                                                                                                     | S29         |
| <b>Figure S20</b> UV spectrum of pheharmine B in MeOH                                                                                                                                                                  | S30         |
| <b>Figure S21</b> Chiral HPLC separation profile of <b>3/4</b>                                                                                                                                                         | S30         |
| <b>Figures S22-S23</b> Experimental ECD spectra of (±)-pheharmine B ( <b>3-4</b> ) in MeOH                                                                                                                             | S31         |

## 1. Experimental section

### HPLC analyses of the crude ethanol extracts of different parts of *P. harmala*

HPLC analysis was performed on a Cosmosil 5C<sub>18</sub>-MS-II column (150 × 4.6 mm I. D., 5 μm) equipped with a LC-6AD pump and a Shimadzu SPD-20A UV-Vis detector (Shimadzu Co. Ltd., Japan). The mobile phase with a flow rate of 0.5 mL/min consisted of solvent A (methanol with 0.1% diethylamine) and solvent B (H<sub>2</sub>O with 0.1% diethylamine). A binary gradient elution was performed as follows:

| Time (min) | A% | B% |
|------------|----|----|
| 0.00       | 10 | 90 |
| 90.00      | 90 | 10 |

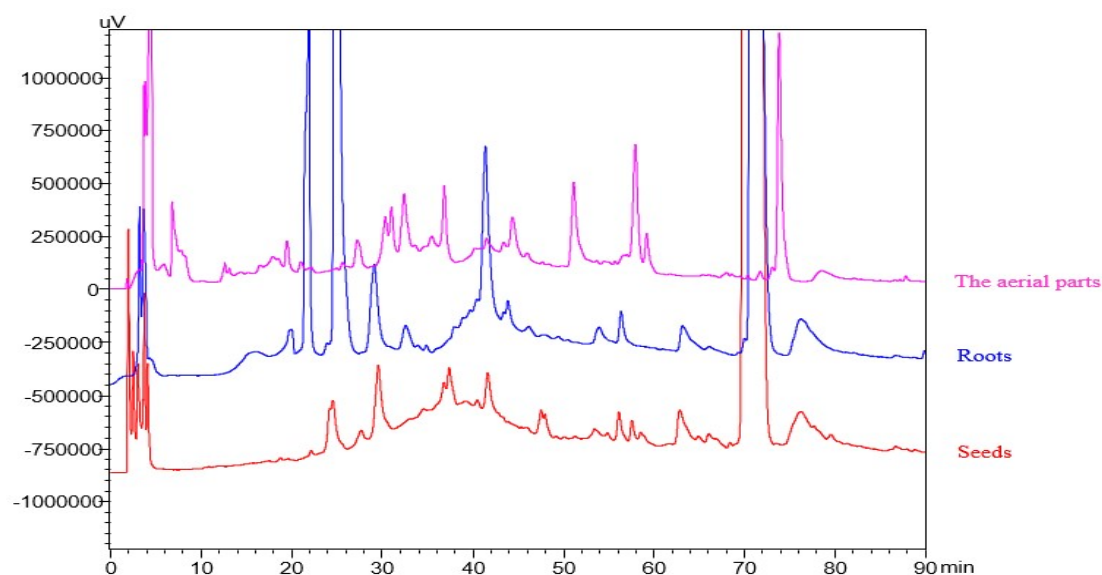

**Figure S1** HPLC chromatogram of the ethanolic extracts of aerial parts, roots, and seeds of *P. harmala*

## 2 Computational methods

Conformational searches for (7'*S*,8'*S*)-pheharminine A and (7'*S*,8'*R*)-pheharminine B were carried out by CONFLEX using molecular mechanics MMFF94s. Their low-energy conformers separately accounting for more than 1% Boltzmann distribution were optimized at the B3LYP/6-31G(d) level in MeOH using the polarizable continuum model (PCM) with the Gaussian 09 program package.<sup>1</sup> ECD calculations of all the conformers were run by the time-dependent density functional theory (TDDFT) method at B3LYP/6-311G+(d,p) level with the PCM in the methanol solvent. The overall calculated ECD spectra were generated by Boltzmann weighting using SpecDis 1.51.<sup>2</sup>

**Table S1** Gibbs free energy changes<sup>a</sup> and equilibrium populations<sup>b</sup> of B3LYP/6-31G(d) optimized low-energy 3D conformers of (7'*S*,8'*S*)-pheharminine A in ECD calculations

| label | conformer                                                                           | $\Delta G$ (kcal/mol) <sup>a</sup> | P(%) <sup>b</sup> |
|-------|-------------------------------------------------------------------------------------|------------------------------------|-------------------|
| A-c1  | 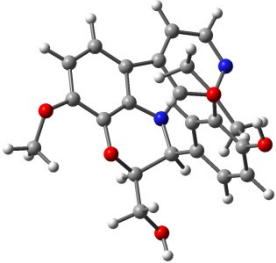  | 0                                  | 0.07              |
| A-c2  |  | -0.37525                           | 0.13              |
| A-c3  |  | -0.98912                           | 0.36              |

|      |  |          |       |
|------|--|----------|-------|
| A-c4 |  | -3.25110 | 16.43 |
| A-c5 |  | -4.07944 | 66.58 |
| A-c6 |  | -3.18512 | 14.7  |
| A-c7 |  | -1.85825 | 1.56  |
| A-c8 |  | -0.53338 | 0.17  |

<sup>a</sup>B3LYP/6-311G+(d,p); <sup>b</sup>ΔG values at 298.15K

**Table S2** Cartesian coordinates for the low-energy 3D conformers of (7'*S*,8'*S*)-pheharmine A at the B3LYP/6-31G(d) level of theory in methanol.

| A-c1 |         |         |         | A-c2 |         |         |         |
|------|---------|---------|---------|------|---------|---------|---------|
| Atom | X       | Y       | Z       | Atom | X       | Y       | Z       |
| C    | 1.586   | -4.5401 | 0.1616  | C    | 1.3888  | -4.4745 | -0.3388 |
| O    | 2.577   | -3.796  | -0.5308 | O    | 2.4482  | -3.7082 | -0.8904 |
| C    | 2.5103  | -2.4292 | -0.4815 | C    | 2.4138  | -2.3489 | -0.7303 |
| C    | 3.532   | -1.8057 | -1.2162 | C    | 3.4303  | -1.6903 | -1.441  |
| C    | 3.6444  | -0.4064 | -1.3076 | C    | 3.5701  | -0.2909 | -1.4269 |
| C    | 2.6907  | 0.3914  | -0.6526 | C    | 2.6507  | 0.4713  | -0.6864 |
| C    | 1.7036  | -0.2509 | 0.0618  | C    | 1.6708  | -0.2054 | 0.0061  |
| C    | 1.5808  | -1.6367 | 0.1992  | C    | 1.5242  | -1.5952 | 0.0418  |
| O    | 0.5293  | -2.1374 | 0.9288  | O    | 0.4919  | -2.1329 | 0.7725  |
| C    | 0.0801  | -1.1914 | 1.9372  | C    | 0.0896  | -1.2526 | 1.8648  |
| H    | 0.9155  | -1.051  | 2.6422  | H    | 0.9494  | -1.2087 | 2.5518  |
| C    | -1.0507 | -1.853  | 2.7296  | C    | -1.0547 | -1.9506 | 2.6077  |
| O    | -1.4894 | -1.0082 | 3.7867  | O    | -0.5774 | -3.148  | 3.2244  |
| C    | -0.2956 | 0.2201  | 1.365   | C    | -0.271  | 0.2019  | 1.4089  |
| H    | -0.3733 | 0.9061  | 2.216   | H    | -0.3032 | 0.8178  | 2.315   |
| C    | -1.6096 | 0.2368  | 0.5858  | C    | -1.6145 | 0.3031  | 0.6929  |
| C    | -2.775  | 0.7138  | 1.2142  | C    | -2.74   | 0.7671  | 1.3992  |
| C    | -3.9961 | 0.7206  | 0.5423  | C    | -3.9862 | 0.8456  | 0.7799  |
| C    | -4.0565 | 0.2471  | -0.7601 | C    | -4.1121 | 0.4577  | -0.5461 |
| O    | -5.2672 | 0.2621  | -1.3977 | O    | -5.3467 | 0.5439  | -1.1293 |
| C    | -2.9214 | -0.2375 | -1.4161 | C    | -3.0182 | -0.0111 | -1.2785 |
| O    | -3.1351 | -0.675  | -2.6983 | O    | -3.295  | -0.36   | -2.5753 |
| C    | -1.989  | -1.1143 | -3.4202 | C    | -2.1935 | -0.7866 | -3.3703 |
| C    | -1.7022 | -0.2452 | -0.7358 | C    | -1.7732 | -0.0908 | -0.6517 |
| N    | 0.8601  | 0.7008  | 0.5859  | N    | 0.8643  | 0.719   | 0.6272  |
| C    | 1.2898  | 1.9699  | 0.2724  | C    | 1.3097  | 2.0004  | 0.3966  |
| C    | 2.4462  | 1.7946  | -0.5128 | C    | 2.4401  | 1.864   | -0.4331 |
| C    | 3.1172  | 2.9258  | -0.9981 | C    | 3.1216  | 3.0158  | -0.8504 |
| C    | 2.5885  | 4.1546  | -0.6612 | C    | 2.6287  | 4.2251  | -0.4066 |
| N    | 1.4842  | 4.3278  | 0.0891  | N    | 1.5485  | 4.3611  | 0.3853  |
| C    | 0.7993  | 3.2535  | 0.5759  | C    | 0.8542  | 3.2666  | 0.8083  |
| C    | -0.4211 | 3.5689  | 1.3805  | C    | -0.3399 | 3.5458  | 1.664   |
| H    | 1.6343  | -4.3588 | 1.2399  | H    | 1.4149  | -4.451  | 0.7548  |
| H    | 0.5877  | -4.3451 | -0.2427 | H    | 0.4173  | -4.1576 | -0.7318 |
| H    | 1.7987  | -5.6019 | 0.0016  | H    | 1.5391  | -5.5147 | -0.6445 |
| H    | 4.263   | -2.4242 | -1.7345 | H    | 4.1336  | -2.2805 | -2.0266 |
| H    | 4.4481  | 0.0411  | -1.8841 | H    | 4.3677  | 0.1845  | -1.9896 |
| H    | -1.9009 | -2.1037 | 2.0864  | H    | -1.4591 | -1.3141 | 3.4001  |
| H    | -0.6957 | -2.7955 | 3.1622  | H    | -1.8631 | -2.2411 | 1.9294  |

|   |         |         |         |   |         |         |         |
|---|---------|---------|---------|---|---------|---------|---------|
| H | -2.1892 | -1.4927 | 4.2616  | H | -0.1552 | -3.673  | 2.5195  |
| H | -2.7403 | 1.0804  | 2.2391  | H | -2.6592 | 1.0749  | 2.4402  |
| H | -4.8936 | 1.0911  | 1.0285  | H | -4.8544 | 1.2063  | 1.324   |
| H | -5.0844 | -0.0934 | -2.2895 | H | -5.2134 | 0.2364  | -2.0473 |
| H | -2.3165 | -1.3959 | -4.4256 | H | -2.5702 | -0.9975 | -4.3758 |
| H | -1.2532 | -0.3098 | -3.5227 | H | -1.4385 | 0.0021  | -3.4561 |
| H | -1.5465 | -2.0008 | -2.954  | H | -1.7591 | -1.7115 | -2.9767 |
| H | -0.8099 | -0.6265 | -1.2211 | H | -0.9117 | -0.4608 | -1.1982 |
| H | 4.0092  | 2.847   | -1.6069 | H | 3.9949  | 2.9666  | -1.4889 |
| H | 3.0592  | 5.0726  | -1.0019 | H | 3.1094  | 5.1573  | -0.6901 |
| H | -1.315  | 3.2088  | 0.8669  | H | -1.2535 | 3.2518  | 1.143   |
| H | -0.3551 | 3.1219  | 2.3755  | H | -0.2657 | 3.0175  | 2.6176  |
| H | -0.5287 | 4.6508  | 1.513   | H | -0.4155 | 4.6156  | 1.8867  |

| A-c3 |         |         |         | A-c4 |         |         |         |
|------|---------|---------|---------|------|---------|---------|---------|
| Atom | X       | Y       | Z       | Atom | X       | Y       | Z       |
| C    | 2.7022  | -4.2328 | -0.264  | C    | 3.9328  | -4.1035 | -0.5278 |
| O    | 3.6886  | -3.2458 | -0.5259 | O    | 2.8578  | -3.3686 | 0.0401  |
| C    | 3.3216  | -1.9302 | -0.4254 | C    | 2.8246  | -2.0195 | -0.196  |
| C    | 4.31    | -1.0483 | -0.8916 | C    | 3.763   | -1.3079 | -0.9558 |
| C    | 4.1337  | 0.3472  | -0.8845 | C    | 3.6496  | 0.0852  | -1.1544 |
| C    | 2.922   | 0.8722  | -0.4032 | C    | 2.561   | 0.7748  | -0.5881 |
| C    | 1.9764  | -0.0193 | 0.0536  | C    | 1.6625  | 0.0414  | 0.1516  |
| C    | 2.131   | -1.408  | 0.0894  | C    | 1.7606  | -1.3265 | 0.3897  |
| O    | 1.0987  | -2.1765 | 0.5714  | O    | 0.7865  | -1.96   | 1.1301  |
| C    | 0.2785  | -1.4388 | 1.5172  | C    | 0.1482  | -1.0337 | 2.0511  |
| H    | 0.9188  | -1.2029 | 2.3826  | H    | 0.9199  | -0.7124 | 2.7693  |
| C    | -0.811  | -2.3861 | 2.0277  | C    | -0.894  | -1.8165 | 2.8541  |
| O    | -1.622  | -1.7502 | 3.0095  | O    | -1.5096 | -0.9856 | 3.8322  |
| C    | -0.2783 | -0.0816 | 0.9615  | C    | -0.4263 | 0.2622  | 1.3712  |
| H    | -0.6442 | 0.4912  | 1.8211  | H    | -0.6382 | 0.9804  | 2.1713  |
| C    | -1.4131 | -0.2483 | -0.0468 | C    | -1.7015 | 0.0191  | 0.5658  |
| C    | -1.1782 | -0.6361 | -1.3767 | C    | -2.9445 | 0.3765  | 1.1204  |
| C    | -2.2392 | -0.8053 | -2.2657 | C    | -4.1291 | 0.1494  | 0.4221  |
| C    | -3.5377 | -0.5907 | -1.827  | C    | -4.0749 | -0.4423 | -0.8313 |
| O    | -4.5593 | -0.7661 | -2.7204 | O    | -5.2516 | -0.6572 | -1.4962 |
| C    | -3.8109 | -0.2075 | -0.5114 | C    | -2.8601 | -0.8188 | -1.4111 |
| O    | -5.1397 | -0.0355 | -0.2209 | O    | -2.9639 | -1.3977 | -2.6502 |
| C    | -5.4522 | 0.4305  | 1.0868  | C    | -1.7441 | -1.7778 | -3.2784 |
| C    | -2.7452 | -0.044  | 0.3749  | C    | -1.6773 | -0.5891 | -0.7056 |
| N    | 0.8664  | 0.6907  | 0.4466  | N    | 0.6607  | 0.8744  | 0.5839  |
| C    | 1.0668  | 2.0445  | 0.3     | C    | 0.8953  | 2.1701  | 0.1838  |
| C    | 2.361   | 2.1788  | -0.2401 | C    | 2.0915  | 2.1266  | -0.5621 |
| C    | 2.8551  | 3.4621  | -0.5123 | C    | 2.5898  | 3.3131  | -1.1179 |
| C    | 2.0236  | 4.5235  | -0.2211 | C    | 1.8618  | 4.4619  | -0.8868 |

|   |         |         |         |   |         |         |         |
|---|---------|---------|---------|---|---------|---------|---------|
| N | 0.7868  | 4.4014  | 0.2967  | N | 0.7203  | 4.5093  | -0.1748 |
| C | 0.2666  | 3.1704  | 0.569   | C | 0.1989  | 3.3769  | 0.3788  |
| C | -1.124  | 3.1599  | 1.1186  | C | -1.0819 | 3.549   | 1.1313  |
| H | 2.4371  | -4.2516 | 0.7976  | H | 3.9129  | -4.0512 | -1.6214 |
| H | 1.823   | -4.1025 | -0.9033 | H | 4.8958  | -3.7644 | -0.1321 |
| H | 3.1379  | -5.2073 | -0.5062 | H | 3.8078  | -5.1527 | -0.2433 |
| H | 5.2432  | -1.4562 | -1.2764 | H | 4.6103  | -1.8056 | -1.4175 |
| H | 4.9186  | 0.9993  | -1.2549 | H | 4.3916  | 0.6133  | -1.7462 |
| H | -1.4457 | -2.7476 | 1.2117  | H | -1.6644 | -2.2452 | 2.2044  |
| H | -0.347  | -3.2704 | 2.4796  | H | -0.4112 | -2.6567 | 3.3662  |
| H | -2.2418 | -2.427  | 3.3379  | H | -2.1389 | -1.5487 | 4.3187  |
| H | -0.1684 | -0.8129 | -1.7417 | H | -2.9987 | 0.8319  | 2.1082  |
| H | -2.0538 | -1.1018 | -3.294  | H | -5.0867 | 0.4289  | 0.851   |
| H | -5.3709 | -0.554  | -2.2201 | H | -4.9875 | -1.0658 | -2.3436 |
| H | -6.5378 | 0.554   | 1.1465  | H | -1.9917 | -2.2088 | -4.2532 |
| H | -5.1582 | -0.302  | 1.8456  | H | -1.1016 | -0.9083 | -3.4527 |
| H | -4.9947 | 1.4067  | 1.2792  | H | -1.224  | -2.5465 | -2.6973 |
| H | -2.9226 | 0.2367  | 1.4094  | H | -0.7226 | -0.8816 | -1.1301 |
| H | 3.8417  | 3.6203  | -0.9295 | H | 3.5025  | 3.3355  | -1.7    |
| H | 2.3441  | 5.545   | -0.4058 | H | 2.1915  | 5.4167  | -1.2867 |
| H | -1.8074 | 2.6944  | 0.4053  | H | -1.8932 | 3.0295  | 0.6172  |
| H | -1.1603 | 2.6301  | 2.0735  | H | -0.9849 | 3.1743  | 2.1531  |
| H | -1.4775 | 4.1812  | 1.2971  | H | -1.3542 | 4.608   | 1.1947  |

| A-c5 |         |         |         | A-c6 |         |         |         |
|------|---------|---------|---------|------|---------|---------|---------|
| Atom | X       | Y       | Z       | Atom | X       | Y       | Z       |
| C    | 3.9963  | -3.8266 | -1.0299 | C    | 4.7741  | -3.6137 | -0.7672 |
| O    | 2.9192  | -3.1827 | -0.3634 | O    | 3.5692  | -3.0934 | -0.2238 |
| C    | 2.8331  | -1.8205 | -0.4803 | C    | 3.3835  | -1.7377 | -0.2926 |
| C    | 3.7149  | -1.0124 | -1.21   | C    | 4.3193  | -0.8175 | -0.7843 |
| C    | 3.5475  | 0.3877  | -1.2797 | C    | 4.0462  | 0.5671  | -0.8188 |
| C    | 2.4618  | 0.9857  | -0.6125 | C    | 2.8     | 1.0344  | -0.3609 |
| C    | 1.6188  | 0.1589  | 0.0933  | C    | 1.909   | 0.1003  | 0.1146  |
| C    | 1.7724  | -1.2196 | 0.2041  | C    | 2.1578  | -1.2671 | 0.1887  |
| O    | 0.8523  | -1.9506 | 0.9219  | O    | 1.1809  | -2.1124 | 0.6673  |
| C    | 0.2233  | -1.1321 | 1.9525  | C    | 0.2864  | -1.4153 | 1.5755  |
| H    | 1.0218  | -0.8797 | 2.6679  | H    | 0.8857  | -1.122  | 2.4526  |
| C    | -0.7769 | -2.0335 | 2.6831  | C    | -0.7496 | -2.4262 | 2.0746  |
| O    | -0.0803 | -3.095  | 3.3401  | O    | -1.6293 | -1.8315 | 3.0239  |
| C    | -0.4148 | 0.1988  | 1.4181  | C    | -0.3482 | -0.1038 | 0.9853  |
| H    | -0.6032 | 0.8303  | 2.2941  | H    | -0.7657 | 0.4568  | 1.8294  |
| C    | -1.7261 | -0.0113 | 0.6676  | C    | -1.453  | -0.3594 | -0.0379 |
| C    | -2.9448 | 0.2728  | 1.3114  | C    | -1.1708 | -0.7695 | -1.3518 |
| C    | -4.1589 | 0.0687  | 0.6581  | C    | -2.2029 | -1.0164 | -2.2565 |
| C    | -4.1587 | -0.4261 | -0.638  | C    | -3.5196 | -0.8589 | -1.8489 |



|   |         |         |         |   |         |         |         |
|---|---------|---------|---------|---|---------|---------|---------|
| O | -5.3643 | -0.6184 | -1.2558 | O | -4.5123 | -1.1092 | -2.757  |
| C | -2.9689 | -0.7281 | -1.306  | C | -3.8395 | -0.4591 | -0.5487 |
| O | -3.1259 | -1.2147 | -2.5784 | O | -5.1813 | -0.351  | -0.2884 |
| C | -1.9346 | -1.5303 | -3.2913 | C | -5.5446 | 0.1112  | 1.0075  |
| C | -1.7559 | -0.5214 | -0.6464 | C | -2.8022 | -0.2169 | 0.3532  |
| N | 0.6111  | 0.9143  | 0.6387  | N | 0.7487  | 0.7387  | 0.4744  |
| C | 0.7862  | 2.2476  | 0.3459  | C | 0.8623  | 2.0987  | 0.2951  |
| C | 1.9511  | 2.3122  | -0.4472 | C | 2.1516  | 2.3045  | -0.2381 |
| C | 2.3884  | 3.5597  | -0.9138 | C | 2.5615  | 3.6103  | -0.5414 |
| C | 1.6353  | 4.6576  | -0.5531 | C | 1.6582  | 4.6211  | -0.2855 |
| N | 0.5233  | 4.6016  | 0.2036  | N | 0.4275  | 4.4309  | 0.2262  |
| C | 0.0607  | 3.4079  | 0.6731  | C | -0.0126 | 3.1757  | 0.5282  |
| C | -1.1956 | 3.4707  | 1.4815  | C | -1.404  | 3.0865  | 1.0681  |
| H | 3.9325  | -3.6831 | -2.1135 | H | 4.8614  | -3.3808 | -1.8337 |
| H | 4.9616  | -3.4861 | -0.641  | H | 5.6451  | -3.2533 | -0.2102 |
| H | 3.9183  | -4.9    | -0.8317 | H | 4.7435  | -4.7029 | -0.6667 |
| H | 4.5581  | -1.4371 | -1.7463 | H | 5.2879  | -1.1398 | -1.1537 |
| H | 4.2467  | 0.9918  | -1.8507 | H | 4.7893  | 1.2594  | -1.2036 |
| H | -1.3279 | -1.4777 | 3.4472  | H | -1.3363 | -2.8428 | 1.2491  |
| H | -1.4868 | -2.4986 | 1.9922  | H | -0.2396 | -3.2694 | 2.5546  |
| H | 0.4781  | -3.5162 | 2.6571  | H | -2.2077 | -2.5464 | 3.3468  |
| H | -2.9627 | 0.6588  | 2.329   | H | -0.1456 | -0.9057 | -1.6902 |
| H | -5.0996 | 0.2919  | 1.1532  | H | -1.9808 | -1.3306 | -3.2722 |
| H | -5.1395 | -0.9621 | -2.1425 | H | -5.3435 | -0.932  | -2.2758 |
| H | -2.2255 | -1.898  | -4.28   | H | -6.6364 | 0.1725  | 1.0459  |
| H | -1.3138 | -0.64   | -3.4366 | H | -5.2234 | -0.5942 | 1.7809  |
| H | -1.375  | -2.3277 | -2.791  | H | -5.1477 | 1.1144  | 1.1955  |
| H | -0.8189 | -0.7565 | -1.1411 | H | -3.0148 | 0.0788  | 1.3767  |
| H | 3.2749  | 3.6652  | -1.5266 | H | 3.5392  | 3.8234  | -0.9549 |
| H | 1.9181  | 5.6549  | -0.8785 | H | 1.9116  | 5.6564  | -0.4956 |
| H | -2.0128 | 2.9852  | 0.9437  | H | -2.0518 | 2.5717  | 0.3554  |
| H | -1.0548 | 2.9976  | 2.4562  | H | -1.4156 | 2.5664  | 2.029   |
| H | -1.4888 | 4.5106  | 1.6613  | H | -1.8205 | 4.0862  | 1.2318  |

| A-c7 |         |         |         | A-c8 |        |         |         |
|------|---------|---------|---------|------|--------|---------|---------|
| Atom | X       | Y       | Z       | Atom | X      | Y       | Z       |
| C    | -2.6552 | -4.0556 | 0.6959  | C    | 1.8315 | -4.4237 | -0.0617 |
| O    | -3.6841 | -3.0758 | 0.6841  | O    | 2.5802 | -3.6067 | -0.9522 |
| C    | -3.301  | -1.769  | 0.538   | C    | 2.5002 | -2.2496 | -0.785  |
| C    | -4.2675 | -0.8525 | 0.9796  | C    | 3.4774 | -1.5441 | -1.5046 |
| C    | -4.0604 | 0.5377  | 0.9218  | C    | 3.5645 | -0.1402 | -1.4709 |
| C    | -2.8429 | 1.0191  | 0.4097  | C    | 2.6272 | 0.5769  | -0.7069 |
| C    | -1.9235 | 0.0922  | -0.03   | C    | 1.676  | -0.1453 | -0.0213 |
| C    | -2.1104 | -1.2921 | -0.018  | C    | 1.5791 | -1.5386 | -0.0108 |
| O    | -1.1132 | -2.1025 | -0.5052 | O    | 0.5455 | -2.1207 | 0.6801  |

|   |         |         |         |   |         |         |         |
|---|---------|---------|---------|---|---------|---------|---------|
| C | -0.292  | -1.4087 | -1.4908 | C | 0.119   | -1.2972 | 1.8046  |
| H | -0.9524 | -1.2088 | -2.3493 | H | 0.975   | -1.2506 | 2.4959  |
| C | 0.7798  | -2.3991 | -1.9582 | C | -1.0171 | -2.0406 | 2.5209  |
| O | 0.1696  | -3.4848 | -2.6586 | O | -0.4953 | -3.1832 | 3.2025  |
| C | 0.3051  | -0.0511 | -0.9847 | C | -0.279  | 0.1622  | 1.3881  |
| H | 0.6625  | 0.4829  | -1.8728 | H | -0.3253 | 0.7506  | 2.3117  |
| C | 1.4657  | -0.2171 | -0.0086 | C | -1.628  | 0.2448  | 0.6787  |
| C | 1.2582  | -0.576  | 1.3341  | C | -2.7563 | 0.7005  | 1.3857  |
| C | 2.3379  | -0.748  | 2.1992  | C | -4.0057 | 0.7576  | 0.7707  |
| C | 3.6283  | -0.5656 | 1.7243  | C | -4.132  | 0.355   | -0.5509 |
| O | 4.668   | -0.743  | 2.5956  | O | -5.3702 | 0.4185  | -1.1294 |
| C | 3.8748  | -0.2121 | 0.395   | C | -3.0353 | -0.1072 | -1.2834 |
| O | 5.1988  | -0.0684 | 0.0708  | O | -3.3134 | -0.4739 | -2.575  |
| C | 5.4953  | 0.3354  | -1.2607 | C | -2.2133 | -0.9211 | -3.3612 |
| C | 2.7902  | -0.0439 | -0.4681 | C | -1.7868 | -0.1632 | -0.6616 |
| N | -0.8061 | 0.7633  | -0.4662 | N | 0.8368  | 0.7364  | 0.6173  |
| C | -0.9722 | 2.1252  | -0.3579 | C | 1.2393  | 2.0368  | 0.4133  |
| C | -2.2554 | 2.3064  | 0.1954  | C | 2.3691  | 1.9559  | -0.4253 |
| C | -2.7173 | 3.6088  | 0.4316  | C | 3.0078  | 3.1384  | -0.8241 |
| C | -1.8668 | 4.6411  | 0.0948  | C | 2.4774  | 4.3211  | -0.3529 |
| N | -0.6399 | 4.4738  | -0.4339 | N | 1.3995  | 4.4045  | 0.4493  |
| C | -0.1507 | 3.2237  | -0.672  | C | 0.7458  | 3.2786  | 0.8548  |
| C | 1.2338  | 3.1659  | -1.2334 | C | -0.4504 | 3.5016  | 1.7236  |
| H | -2.307  | -4.2634 | -0.3201 | H | 2.0362  | -4.1761 | 0.9851  |
| H | -1.8292 | -3.7745 | 1.3579  | H | 0.7629  | -4.3753 | -0.2922 |
| H | -3.0862 | -4.9825 | 1.0874  | H | 2.1499  | -5.4592 | -0.2187 |
| H | -5.2046 | -1.227  | 1.3882  | H | 4.1959  | -2.1001 | -2.1045 |
| H | -4.827  | 1.2194  | 1.2773  | H | 4.3375  | 0.3728  | -2.0347 |
| H | 1.486   | -1.924  | -2.6453 | H | -1.4935 | -1.4048 | 3.273   |
| H | 1.3298  | -2.8308 | -1.1163 | H | -1.7663 | -2.399  | 1.8075  |
| H | -0.5215 | -3.8411 | -2.069  | H | -1.2562 | -3.7103 | 3.5029  |
| H | 0.2553  | -0.7272 | 1.7291  | H | -2.6742 | 1.0202  | 2.4228  |
| H | 2.1739  | -1.022  | 3.2376  | H | -4.8761 | 1.114   | 1.3141  |
| H | 5.4725  | -0.5623 | 2.0718  | H | -5.2349 | 0.108   | -2.0463 |
| H | 6.5823  | 0.4255  | -1.3483 | H | -2.5921 | -1.1569 | -4.3603 |
| H | 5.1638  | -0.4178 | -1.9831 | H | -1.4585 | -0.1349 | -3.4682 |
| H | 5.0603  | 1.3156  | -1.4823 | H | -1.7783 | -1.8361 | -2.9456 |
| H | 2.9518  | 0.2247  | -1.5077 | H | -0.9217 | -0.5276 | -1.2068 |
| H | -3.6944 | 3.8028  | 0.8563  | H | 3.8778  | 3.1313  | -1.4688 |
| H | -2.1621 | 5.6751  | 0.2498  | H | 2.9241  | 5.2745  | -0.6209 |
| H | 1.915   | 2.7149  | -0.5086 | H | -1.3597 | 3.2132  | 1.1919  |
| H | 1.2512  | 2.5994  | -2.1675 | H | -0.3653 | 2.9373  | 2.6553  |
| H | 1.6049  | 4.1726  | -1.4541 | H | -0.544  | 4.56    | 1.9896  |

**Table S3** Gibbs free energies changes<sup>a</sup> and equilibrium populations<sup>b</sup> of B3LYP/6-31G(d) optimized low-energy 3D conformers of (7'*S*,8'*R*)-pheharmine B in ECD calculations

| Label | Conformer                                                                           | $\Delta G$ (kcal/mol) <sup>a</sup> | P(%) <sup>b</sup> |
|-------|-------------------------------------------------------------------------------------|------------------------------------|-------------------|
| B-c1  | 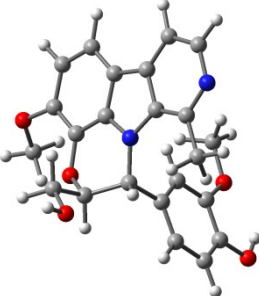   | 0                                  | 0.41              |
| B-c2  |   | -0.66232                           | 1.24              |
| B-c3  |  | -0.07569                           | 0.46              |
| B-c4  |  | -2.35507                           | 21.64             |

|             |                                                                                     |          |       |
|-------------|-------------------------------------------------------------------------------------|----------|-------|
| <b>B-c5</b> | 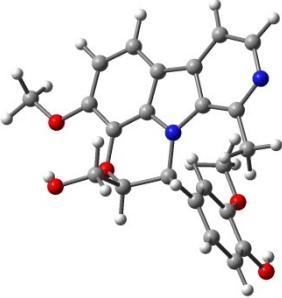   | -2.5383  | 29.49 |
| <b>B-c6</b> |    | -0.61793 | 1.15  |
| <b>B-c7</b> |   | -2.33512 | 20.92 |
| <b>B-c8</b> |  | 0.49335  | 0.18  |
| <b>B-c9</b> |  | -2.42898 | 24.52 |

<sup>a</sup>B3LYP/6-311G+(d,p); <sup>b</sup> $\Delta$ G values at 298.15K

**Table S4** Cartesian coordinates for the low-energy 3D conformers of (7'S,8'S)-pheharminine B at the B3LYP/6-31G(d) level of theory in methanol.

| B-c1 |         |         |         | B-c2 |         |         |         |
|------|---------|---------|---------|------|---------|---------|---------|
| Atom | X       | Y       | Z       | Atom | X       | Y       | Z       |
| C    | -1.9558 | -4.3858 | -0.0536 | C    | -2.1132 | -4.1    | -0.6991 |
| O    | -2.8812 | -3.5368 | -0.7175 | O    | -3.0817 | -3.1321 | -1.0823 |
| C    | -2.6253 | -2.1913 | -0.724  | C    | -2.7303 | -1.814  | -0.9595 |
| C    | -3.4607 | -1.4785 | -1.5986 | C    | -3.4966 | -0.9539 | -1.7602 |
| C    | -3.3616 | -0.085  | -1.7591 | C    | -3.2864 | 0.4367  | -1.7744 |
| C    | -2.387  | 0.6109  | -1.0237 | C    | -2.2733 | 0.9753  | -0.962  |
| C    | -1.59   | -0.1181 | -0.1677 | C    | -1.5515 | 0.1027  | -0.1767 |
| C    | -1.6797 | -1.4956 | 0.0364  | C    | -1.7531 | -1.2758 | -0.117  |
| O    | -0.8298 | -2.0954 | 0.9307  | O    | -0.9871 | -2.0307 | 0.7346  |
| C    | -0.2915 | -1.1864 | 1.9296  | C    | -0.3984 | -1.2694 | 1.8304  |
| H    | 0.5409  | -1.7274 | 2.3995  | H    | 0.3613  | -1.9396 | 2.2539  |
| C    | -1.3389 | -0.9648 | 3.0366  | C    | -1.4627 | -1.0609 | 2.9251  |
| O    | -0.7731 | -0.2396 | 4.123   | O    | -1.9369 | -2.3231 | 3.3935  |
| C    | 0.2711  | 0.1625  | 1.3646  | C    | 0.2791  | 0.078   | 1.4133  |
| H    | 0.3466  | 0.8843  | 2.1845  | H    | 0.3782  | 0.6997  | 2.3106  |
| C    | 1.6731  | -0.0397 | 0.7902  | C    | 1.6785  | -0.1755 | 0.8575  |
| C    | 2.7846  | 0.1368  | 1.6357  | C    | 2.7772  | -0.1509 | 1.7369  |
| C    | 4.0793  | -0.0582 | 1.1582  | C    | 4.0668  | -0.399  | 1.27    |
| C    | 4.2656  | -0.4371 | -0.1633 | C    | 4.2606  | -0.679  | -0.0749 |
| O    | 5.5465  | -0.6226 | -0.6078 | O    | 5.5366  | -0.9188 | -0.5068 |
| C    | 3.1852  | -0.6314 | -1.0291 | C    | 3.1926  | -0.7214 | -0.9755 |
| O    | 3.5244  | -1.0101 | -2.3029 | O    | 3.5373  | -1.0157 | -2.2697 |
| C    | 2.4521  | -1.1755 | -3.2248 | C    | 2.4822  | -1.0207 | -3.2256 |
| C    | 1.8902  | -0.4372 | -0.5446 | C    | 1.9024  | -0.475  | -0.5019 |
| N    | -0.6983 | 0.7397  | 0.4266  | N    | -0.6123 | 0.822   | 0.5181  |
| C    | -0.9019 | 2.0351  | 0.0097  | C    | -0.7019 | 2.1642  | 0.2303  |
| C    | -1.967  | 1.9742  | -0.9091 | C    | -1.751  | 2.2821  | -0.702  |
| C    | -2.408  | 3.1573  | -1.5181 | C    | -2.0871 | 3.5523  | -1.1905 |
| C    | -1.755  | 4.3198  | -1.1634 | C    | -1.3515 | 4.617   | -0.7121 |
| N    | -0.7356 | 4.3829  | -0.286  | N    | -0.3448 | 4.5084  | 0.1756  |
| C    | -0.2726 | 3.254   | 0.3231  | C    | 0.0175  | 3.2908  | 0.67    |
| C    | 0.8728  | 3.4418  | 1.2668  | C    | 1.1629  | 3.291   | 1.632   |
| H    | -0.9362 | -4.2397 | -0.4248 | H    | -1.1224 | -3.8721 | -1.1066 |
| H    | -2.0183 | -4.2606 | 1.0316  | H    | -2.0879 | -4.2122 | 0.3888  |
| H    | -2.2378 | -5.4196 | -0.2771 | H    | -2.4249 | -5.0622 | -1.1177 |
| H    | -4.208  | -2.0208 | -2.1757 | H    | -4.2745 | -1.3742 | -2.3955 |
| H    | -4.0223 | 0.4347  | -2.4462 | H    | -3.894  | 1.0747  | -2.4089 |
| H    | -2.2113 | -0.4154 | 2.6687  | H    | -1.0387 | -0.5291 | 3.7823  |

|   |         |         |         |   |         |         |         |
|---|---------|---------|---------|---|---------|---------|---------|
| H | -1.6968 | -1.9312 | 3.4089  | H | -2.3297 | -0.4986 | 2.5658  |
| H | -1.4637 | -0.1711 | 4.8074  | H | -2.2728 | -2.7986 | 2.6098  |
| H | 2.6491  | 0.4285  | 2.676   | H | 2.6406  | 0.0633  | 2.7952  |
| H | 4.9369  | 0.0819  | 1.8096  | H | 4.9158  | -0.3763 | 1.9471  |
| H | 5.4506  | -0.8766 | -1.5465 | H | 5.4497  | -1.0875 | -1.4654 |
| H | 2.8837  | -1.4521 | -4.1916 | H | 2.9195  | -1.2447 | -4.2033 |
| H | 1.7865  | -1.9872 | -2.9131 | H | 1.7511  | -1.8042 | -3.0005 |
| H | 1.9005  | -0.2395 | -3.3621 | H | 2.0038  | -0.0379 | -3.2919 |
| H | 1.0352  | -0.5948 | -1.1938 | H | 1.0563  | -0.5153 | -1.1803 |
| H | -3.222  | 3.167   | -2.2321 | H | -2.885  | 3.6995  | -1.9077 |
| H | -2.0466 | 5.2731  | -1.5955 | H | -1.56   | 5.6295  | -1.0466 |
| H | 0.6021  | 3.107   | 2.2714  | H | 0.8591  | 2.8679  | 2.5929  |
| H | 1.7492  | 2.8933  | 0.9146  | H | 2.0016  | 2.7231  | 1.2231  |
| H | 1.1495  | 4.4994  | 1.3345  | H | 1.5134  | 4.312   | 1.8173  |

| <b>B-c3</b> |         |         |         | <b>B-c4</b> |         |         |         |
|-------------|---------|---------|---------|-------------|---------|---------|---------|
| Atom        | X       | Y       | Z       | Atom        | X       | Y       | Z       |
| C           | -2.4997 | -4.2766 | -0.4767 | C           | -4.1013 | -3.8947 | -0.7037 |
| O           | -3.5383 | -3.3158 | -0.611  | O           | -3.0721 | -3.1896 | -0.0242 |
| C           | -3.1839 | -1.9938 | -0.5545 | C           | -2.8665 | -1.8817 | -0.3766 |
| C           | -4.1661 | -1.1345 | -1.0708 | C           | -3.6377 | -1.164  | -1.3005 |
| C           | -3.9952 | 0.2608  | -1.1037 | C           | -3.36   | 0.1862  | -1.6016 |
| C           | -2.799  | 0.8064  | -0.6065 | C           | -2.2768 | 0.8231  | -0.9679 |
| C           | -1.8614 | -0.0655 | -0.0963 | C           | -1.544  | 0.0841  | -0.0672 |
| C           | -2.0098 | -1.4505 | -0.0228 | C           | -1.8047 | -1.2388 | 0.2693  |
| O           | -1.0077 | -2.2037 | 0.5345  | O           | -1.0016 | -1.8879 | 1.1781  |
| C           | -0.145  | -1.4575 | 1.4345  | C           | -0.2945 | -0.9806 | 2.0675  |
| H           | 0.7348  | -2.0957 | 1.5926  | H           | 0.4891  | -1.5861 | 2.5428  |
| C           | -0.8304 | -1.3255 | 2.807   | C           | -1.2422 | -0.5406 | 3.1985  |
| O           | 0.072   | -0.7838 | 3.7665  | O           | -0.5361 | 0.2002  | 4.1886  |
| C           | 0.3562  | -0.0767 | 0.8878  | C           | 0.4031  | 0.2404  | 1.3681  |
| H           | 0.697   | 0.5316  | 1.7322  | H           | 0.5994  | 1.0113  | 2.1205  |
| C           | 1.5443  | -0.2708 | -0.0531 | C           | 1.7449  | -0.1798 | 0.7688  |
| C           | 1.3806  | -0.5183 | -1.4263 | C           | 2.9143  | -0.0156 | 1.5346  |
| C           | 2.4899  | -0.7125 | -2.2486 | C           | 4.1544  | -0.4034 | 1.0308  |
| C           | 3.7631  | -0.6678 | -1.699  | C           | 4.2269  | -0.9658 | -0.2355 |
| O           | 4.8329  | -0.8628 | -2.5298 | O           | 5.4561  | -1.3389 | -0.7077 |
| C           | 3.964   | -0.4348 | -0.3355 | C           | 3.0845  | -1.158  | -1.0183 |
| O           | 5.2757  | -0.4235 | 0.0632  | O           | 3.3115  | -1.7325 | -2.2431 |
| C           | 5.5239  | -0.1647 | 1.4401  | C           | 2.1702  | -1.9438 | -3.0673 |
| C           | 2.8504  | -0.2427 | 0.4839  | C           | 1.8449  | -0.7675 | -0.5084 |
| N           | -0.7727 | 0.6625  | 0.3129  | N           | -0.5231 | 0.8613  | 0.4133  |
| C           | -0.9733 | 2.0097  | 0.1159  | C           | -0.5787 | 2.129   | -0.1196 |
| C           | -2.2501 | 2.1209  | -0.4672 | C           | -1.6806 | 2.1238  | -0.9985 |
| C           | -2.7403 | 3.3931  | -0.7927 | C           | -1.9906 | 3.293   | -1.7068 |

|   |         |         |         |   |         |         |         |
|---|---------|---------|---------|---|---------|---------|---------|
| C | -1.9214 | 4.4665  | -0.5081 | C | -1.1806 | 4.3877  | -1.4845 |
| N | -0.7002 | 4.3656  | 0.0503  | N | -0.1276 | 4.3979  | -0.6456 |
| C | -0.1834 | 3.1455  | 0.3727  | C | 0.2116  | 3.2794  | 0.0574  |
| C | 1.1895  | 3.1533  | 0.9664  | C | 1.4089  | 3.4022  | 0.9456  |
| H | -1.6539 | -4.0579 | -1.1371 | H | -5.0834 | -3.4604 | -0.49   |
| H | -2.1877 | -4.3682 | 0.568   | H | -3.9108 | -3.9329 | -1.7814 |
| H | -2.9067 | -5.2466 | -0.7795 | H | -4.1048 | -4.9233 | -0.3303 |
| H | -5.0874 | -1.5601 | -1.465  | H | -4.4778 | -1.6229 | -1.8128 |
| H | -4.7729 | 0.8974  | -1.5143 | H | -3.9741 | 0.7217  | -2.3198 |
| H | -1.7155 | -0.683  | 2.7603  | H | -2.0639 | 0.078   | 2.8233  |
| H | -1.1611 | -2.3106 | 3.1546  | H | -1.6893 | -1.4216 | 3.6725  |
| H | -0.4032 | -0.7633 | 4.6175  | H | -1.1696 | 0.3863  | 4.9053  |
| H | 0.3912  | -0.5655 | -1.8768 | H | 2.8672  | 0.4175  | 2.5325  |
| H | 2.3618  | -0.8991 | -3.3109 | H | 5.0572  | -0.2719 | 1.6197  |
| H | 5.6171  | -0.7883 | -1.9523 | H | 5.2804  | -1.7041 | -1.5968 |
| H | 6.6076  | -0.1755 | 1.5917  | H | 2.5134  | -2.4006 | -4.0006 |
| H | 5.157   | 0.826   | 1.7281  | H | 1.4663  | -2.638  | -2.5964 |
| H | 5.0914  | -0.9472 | 2.0722  | H | 1.6845  | -0.9954 | -3.3201 |
| H | 2.9688  | -0.0686 | 1.5496  | H | 0.9415  | -0.9176 | -1.0905 |
| H | -3.7141 | 3.5348  | -1.2446 | H | -2.8245 | 3.3436  | -2.3955 |
| H | -2.2396 | 5.4807  | -0.7328 | H | -1.3647 | 5.3268  | -1.9989 |
| H | 1.1814  | 2.7009  | 1.9614  | H | 1.1456  | 3.1736  | 1.9814  |
| H | 1.8865  | 2.6171  | 0.3186  | H | 2.2028  | 2.7334  | 0.6059  |
| H | 1.5595  | 4.1786  | 1.0734  | H | 1.8041  | 4.4234  | 0.9238  |

| B-c5 |         |         |         | B-c6 |         |         |         |
|------|---------|---------|---------|------|---------|---------|---------|
| Atom | X       | Y       | Z       | Atom | X       | Y       | Z       |
| C    | -4.323  | -3.3591 | -1.2938 | C    | -2.5662 | -4.0198 | -0.964  |
| O    | -3.249  | -2.8391 | -0.5222 | O    | -3.6008 | -3.049  | -0.8579 |
| C    | -2.9325 | -1.5175 | -0.696  | C    | -3.2036 | -1.7451 | -0.721  |
| C    | -3.6147 | -0.6254 | -1.5332 | C    | -4.1412 | -0.8146 | -1.1914 |
| C    | -3.2262 | 0.7269  | -1.6415 | C    | -3.9095 | 0.5713  | -1.1291 |
| C    | -2.1226 | 1.1875  | -0.8992 | C    | -2.6999 | 1.0311  | -0.5787 |
| C    | -1.4775 | 0.2796  | -0.0907 | C    | -1.8102 | 0.088   | -0.1115 |
| C    | -1.847  | -1.052  | 0.0533  | C    | -2.0205 | -1.2898 | -0.132  |
| O    | -1.1296 | -1.8778 | 0.887   | O    | -1.0734 | -2.1246 | 0.4051  |
| C    | -0.395  | -1.1545 | 1.9181  | C    | -0.1962 | -1.4735 | 1.37    |
| H    | 0.3068  | -1.8935 | 2.3269  | H    | 0.6346  | -2.1784 | 1.5064  |
| C    | -1.37   | -0.7957 | 3.0557  | C    | -0.9241 | -1.3826 | 2.7252  |
| O    | -1.9727 | -1.9813 | 3.575   | O    | -1.2745 | -2.6894 | 3.18    |
| C    | 0.4082  | 0.0961  | 1.4195  | C    | 0.3753  | -0.0867 | 0.9225  |
| H    | 0.6082  | 0.7357  | 2.2869  | H    | 0.7144  | 0.4434  | 1.82    |
| C    | 1.7482  | -0.3323 | 0.8264  | C    | 1.5803  | -0.2741 | 0.0038  |
| C    | 2.8949  | -0.321  | 1.6422  | C    | 1.4388  | -0.4566 | -1.3823 |
| C    | 4.1299  | -0.7242 | 1.1373  | C    | 2.5584  | -0.6477 | -2.1909 |

|   |         |         |         |   |         |         |         |
|---|---------|---------|---------|---|---------|---------|---------|
| C | 4.2194  | -1.1492 | -0.1804 | C | 3.8206  | -0.6649 | -1.6156 |
| O | 5.4435  | -1.5401 | -0.6509 | O | 4.9006  | -0.8553 | -2.4338 |
| C | 3.099   | -1.188  | -1.0153 | C | 3.9998  | -0.4974 | -0.2397 |
| O | 3.3403  | -1.6384 | -2.288  | O | 5.3029  | -0.5421 | 0.1833  |
| C | 2.2214  | -1.6949 | -3.1663 | C | 5.5344  | -0.3565 | 1.5746  |
| C | 1.8646  | -0.7827 | -0.5044 | C | 2.8755  | -0.3079 | 0.5664  |
| N | -0.4247 | 0.9052  | 0.5231  | N | -0.702  | 0.7383  | 0.3683  |
| C | -0.3663 | 2.2328  | 0.1652  | C | -0.8379 | 2.1026  | 0.2523  |
| C | -1.4335 | 2.4307  | -0.7347 | C | -2.0978 | 2.308   | -0.3429 |
| C | -1.6332 | 3.7052  | -1.2831 | C | -2.5268 | 3.6192  | -0.5913 |
| C | -0.7548 | 4.6947  | -0.8927 | C | -1.6674 | 4.6344  | -0.2248 |
| N | 0.267   | 4.5101  | -0.0356 | N | -0.461  | 4.443   | 0.342   |
| C | 0.5     | 3.2849  | 0.5152  | C | -0.003  | 3.1835  | 0.591   |
| C | 1.6775  | 3.1958  | 1.4332  | C | 1.3619  | 3.0937  | 1.196   |
| H | -5.2673 | -2.8689 | -1.0352 | H | -1.7562 | -3.6901 | -1.6237 |
| H | -4.1152 | -3.2789 | -2.366  | H | -2.1923 | -4.2932 | 0.027   |
| H | -4.4236 | -4.4218 | -1.0533 | H | -3.003  | -4.9204 | -1.4069 |
| H | -4.4689 | -0.9441 | -2.1228 | H | -5.0732 | -1.1736 | -1.6246 |
| H | -3.774  | 1.4001  | -2.2946 | H | -4.6527 | 1.2669  | -1.507  |
| H | -0.8442 | -0.3025 | 3.8789  | H | -0.2769 | -0.9323 | 3.4841  |
| H | -2.1785 | -0.139  | 2.721   | H | -1.8466 | -0.7972 | 2.6679  |
| H | -2.3192 | -2.4715 | 2.8028  | H | -1.8176 | -3.089  | 2.4732  |
| H | 2.8393  | 0.0046  | 2.6792  | H | 0.4585  | -0.4543 | -1.855  |
| H | 5.0166  | -0.7105 | 1.7642  | H | 2.4471  | -0.7839 | -3.2629 |
| H | 5.2837  | -1.7971 | -1.5801 | H | 5.676   | -0.831  | -1.8403 |
| H | 2.5747  | -2.0682 | -4.1324 | H | 6.6142  | -0.4083 | 1.7435  |
| H | 1.4641  | -2.3939 | -2.7962 | H | 5.1924  | 0.6304  | 1.9034  |
| H | 1.797   | -0.6987 | -3.3296 | H | 5.0665  | -1.1539 | 2.1614  |
| H | 0.9774  | -0.8151 | -1.1287 | H | 2.9819  | -0.1818 | 1.6396  |
| H | -2.4369 | 3.9119  | -1.9788 | H | -3.4855 | 3.833   | -1.0472 |
| H | -0.8528 | 5.7061  | -1.2772 | H | -1.9378 | 5.6742  | -0.3866 |
| H | 1.3749  | 2.8267  | 2.4162  | H | 1.326   | 2.567   | 2.1529  |
| H | 2.44    | 2.5406  | 1.0064  | H | 2.0455  | 2.5827  | 0.5143  |
| H | 2.1313  | 4.1821  | 1.5779  | H | 1.7686  | 4.0929  | 1.385   |

| B-c7 |         |         |         | B-c8 |         |         |         |
|------|---------|---------|---------|------|---------|---------|---------|
| Atom | X       | Y       | Z       | Atom | X       | Y       | Z       |
| C    | -4.6369 | -3.6769 | -0.9199 | C    | -4.2849 | -3.0959 | -0.2652 |
| O    | -3.4771 | -3.1354 | -0.3035 | O    | -3.1666 | -2.837  | -1.1135 |
| C    | -3.2765 | -1.7851 | -0.4213 | C    | -2.8195 | -1.5137 | -1.0406 |
| C    | -4.1949 | -0.8785 | -0.9675 | C    | -3.4529 | -0.5968 | -1.8844 |
| C    | -3.9134 | 0.5021  | -1.0402 | C    | -3.103  | 0.7656  | -1.8613 |
| C    | -2.6779 | 0.9778  | -0.5628 | C    | -2.0772 | 1.1937  | -0.9941 |
| C    | -1.8032 | 0.0554  | -0.0347 | C    | -1.4693 | 0.2446  | -0.2006 |
| C    | -2.0587 | -1.3062 | 0.0739  | C    | -1.8065 | -1.1024 | -0.1765 |



|   |         |         |         |   |         |         |         |
|---|---------|---------|---------|---|---------|---------|---------|
| O | -1.1105 | -2.1431 | 0.6144  | O | -1.1357 | -1.975  | 0.6441  |
| C | -0.1642 | -1.4558 | 1.4765  | C | -0.458  | -1.3145 | 1.7558  |
| H | 0.6707  | -2.1564 | 1.6134  | H | 0.2443  | -2.0676 | 2.137   |
| C | -0.795  | -1.2649 | 2.8679  | C | -1.489  | -1.0661 | 2.8731  |
| O | 0.1688  | -0.7726 | 3.7946  | O | -2.0573 | -2.3055 | 3.2983  |
| C | 0.4237  | -0.1163 | 0.905   | C | 0.3351  | -0.0109 | 1.3934  |
| H | 0.8218  | 0.4738  | 1.7372  | H | 0.479   | 0.5628  | 2.316   |
| C | 1.5791  | -0.4019 | -0.0535 | C | 1.7117  | -0.3636 | 0.8348  |
| C | 1.3709  | -0.6761 | -1.4155 | C | 2.8208  | -0.3792 | 1.7009  |
| C | 2.449   | -0.9504 | -2.2562 | C | 4.0873  | -0.7172 | 1.2273  |
| C | 3.735   | -0.9606 | -1.7354 | C | 4.2463  | -1.0506 | -0.1101 |
| O | 4.774   | -1.233  | -2.5836 | O | 5.5     | -1.3793 | -0.5488 |
| C | 3.979   | -0.7064 | -0.3827 | C | 3.1652  | -1.0605 | -0.996  |
| O | 5.2982  | -0.7572 | -0.0124 | O | 3.4741  | -1.419  | -2.2831 |
| C | 5.5887  | -0.4974 | 1.356   | C | 2.395   | -1.4535 | -3.2113 |
| C | 2.8964  | -0.4333 | 0.455   | C | 1.8991  | -0.7199 | -0.5164 |
| N | -0.6554 | 0.7019  | 0.3401  | N | -0.4744 | 0.8472  | 0.5225  |
| C | -0.7576 | 2.0558  | 0.1144  | C | -0.4332 | 2.1993  | 0.2708  |
| C | -2.0295 | 2.2497  | -0.461  | C | -1.4387 | 2.4378  | -0.688  |
| C | -2.4243 | 3.5472  | -0.8151 | C | -1.6345 | 3.744   | -1.1577 |
| C | -1.5233 | 4.5616  | -0.5637 | C | -0.8165 | 4.7228  | -0.6323 |
| N | -0.3083 | 4.382   | -0.0118 | N | 0.1446  | 4.5     | 0.2839  |
| C | 0.1177  | 3.1344  | 0.3376  | C | 0.3741  | 3.2431  | 0.7593  |
| C | 1.4923  | 3.0521  | 0.9211  | C | 1.4833  | 3.1147  | 1.7543  |
| H | -5.5468 | -3.3137 | -0.4313 | H | -4.0718 | -2.8204 | 0.7736  |
| H | -4.6524 | -3.4648 | -1.9942 | H | -5.1789 | -2.573  | -0.6218 |
| H | -4.605  | -4.7637 | -0.7961 | H | -4.4868 | -4.1708 | -0.2956 |
| H | -5.1565 | -1.2088 | -1.348  | H | -4.2239 | -0.939  | -2.5701 |
| H | -4.6425 | 1.1851  | -1.4662 | H | -3.6071 | 1.4701  | -2.5161 |
| H | -1.6375 | -0.5663 | 2.8397  | H | -1.0187 | -0.6017 | 3.7451  |
| H | -1.1786 | -2.2225 | 3.2375  | H | -2.3134 | -0.4272 | 2.5428  |
| H | -0.2732 | -0.7354 | 4.6626  | H | -2.2859 | -2.7969 | 2.4858  |
| H | 0.3695  | -0.6841 | -1.8413 | H | 2.7113  | -0.1255 | 2.7536  |
| H | 2.2864  | -1.1581 | -3.3097 | H | 4.9451  | -0.7237 | 1.8934  |
| H | 5.5729  | -1.1913 | -2.0232 | H | 5.3886  | -1.5761 | -1.4996 |
| H | 6.6727  | -0.5695 | 1.4865  | H | 2.7999  | -1.7564 | -4.1817 |
| H | 5.2859  | 0.5165  | 1.6381  | H | 1.6451  | -2.1954 | -2.9173 |
| H | 5.1244  | -1.2458 | 2.0066  | H | 1.9469  | -0.4617 | -3.3325 |
| H | 3.0477  | -0.2401 | 1.5132  | H | 1.0423  | -0.7308 | -1.1825 |
| H | -3.3886 | 3.7519  | -1.2631 | H | -2.3905 | 3.982   | -1.8956 |
| H | -1.7655 | 5.5913  | -0.8117 | H | -0.9157 | 5.7572  | -0.9496 |
| H | 1.4619  | 2.6064  | 1.9186  | H | 1.1192  | 2.6696  | 2.6836  |
| H | 2.1459  | 2.4665  | 0.2707  | H | 2.2925  | 2.5081  | 1.3417  |
| H | 1.9318  | 4.0504  | 1.0197  | H | 1.8985  | 4.0977  | 2.0009  |

| Atom | B-c9    |         |         |
|------|---------|---------|---------|
|      | X       | Y       | Z       |
| C    | -4.7585 | -3.2877 | -1.2586 |
| O    | -3.5692 | -2.8596 | -0.6093 |
| C    | -3.297  | -1.5168 | -0.6217 |
| C    | -4.1537 | -0.5227 | -1.1119 |
| C    | -3.7994 | 0.8425  | -1.0681 |
| C    | -2.5535 | 1.2132  | -0.5282 |
| C    | -1.7393 | 0.2068  | -0.0604 |
| C    | -2.0672 | -1.1433 | -0.07   |
| O    | -1.1786 | -2.0704 | 0.4228  |
| C    | -0.2241 | -1.5044 | 1.367   |
| H    | 0.5534  | -2.2733 | 1.4684  |
| C    | -0.9077 | -1.385  | 2.7425  |
| O    | -1.3628 | -2.6675 | 3.1744  |
| C    | 0.4425  | -0.1553 | 0.9271  |
| H    | 0.8309  | 0.3357  | 1.8269  |
| C    | 1.6186  | -0.4191 | -0.0101 |
| C    | 1.4387  | -0.614  | -1.39   |
| C    | 2.5298  | -0.8721 | -2.2186 |
| C    | 3.8014  | -0.9452 | -1.6689 |
| O    | 4.8535  | -1.1998 | -2.5061 |
| C    | 4.0174  | -0.7705 | -0.2991 |
| O    | 5.3253  | -0.8761 | 0.098   |
| C    | 5.5926  | -0.6988 | 1.4839  |
| C    | 2.9214  | -0.5134 | 0.527   |
| N    | -0.5725 | 0.76    | 0.3957  |
| C    | -0.5989 | 2.1309  | 0.2765  |
| C    | -1.845  | 2.4368  | -0.3076 |
| C    | -2.1661 | 3.7775  | -0.5613 |
| C    | -1.2221 | 4.7202  | -0.2095 |
| N    | -0.0305 | 4.4331  | 0.3482  |
| C    | 0.3244  | 3.1415  | 0.6019  |
| C    | 1.683   | 2.9436  | 1.1948  |
| H    | -5.6462 | -2.9046 | -0.7449 |
| H    | -4.7585 | -3.0027 | -2.316  |
| H    | -4.7918 | -4.3803 | -1.2089 |
| H    | -5.1222 | -0.77   | -1.5357 |
| H    | -4.4828 | 1.5948  | -1.4512 |
| H    | -0.2069 | -1.0114 | 3.4952  |
| H    | -1.7767 | -0.7207 | 2.7208  |
| H    | -1.8839 | -3.0348 | 2.4323  |
| H    | 0.4488  | -0.5717 | -1.8406 |
| H    | 2.3886  | -1.0184 | -3.2856 |

|   |         |         |         |
|---|---------|---------|---------|
| H | 5.6402  | -1.2114 | -1.9274 |
| H | 6.6712  | -0.8076 | 1.6327  |
| H | 5.3102  | 0.3062  | 1.8146  |
| H | 5.0942  | -1.468  | 2.083   |
| H | 3.0562  | -0.3796 | 1.5959  |
| H | -3.1081 | 4.0675  | -1.0097 |
| H | -1.4068 | 5.7778  | -0.3761 |
| H | 1.6173  | 2.3998  | 2.1404  |
| H | 2.3247  | 2.4019  | 0.4963  |
| H | 2.1593  | 3.9077  | 1.4026  |

## References

- [1] M.J. Frisch, G.W. Trucks, H.B. Schlegel, et al., *Gaussian 09*, Wallingford CT, 2010.
- [2] T. Bruhn, Y. Hemberger, A. Schaumlöffel, et al., *SpecDis*, version 1.51; Germany, 2010.

### 3 NMR, HRESIMS, UV, and ECD spectra

#### Spectra of pheharmine A

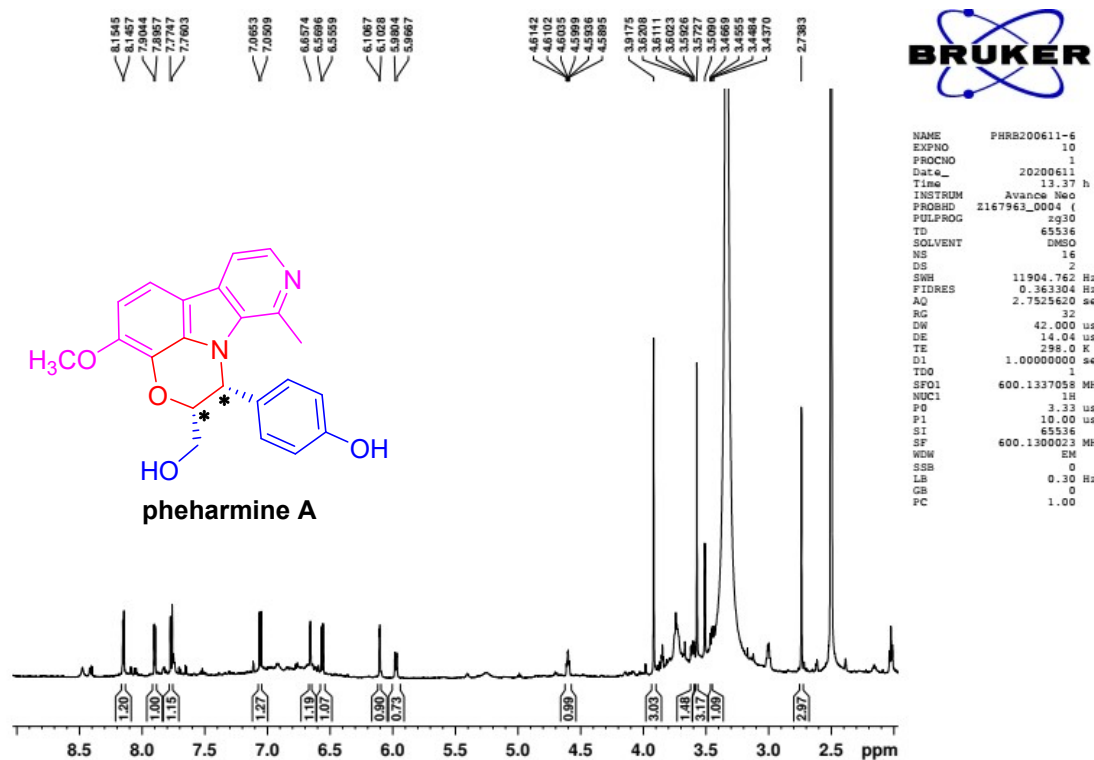

Figure S2  $^1\text{H}$  NMR spectrum (600 MHz) of pheharmine A in  $\text{DMSO-}d_6$

Figure S3  $^{13}\text{C}$  NMR (150 MHz) spectrum of pheharmine A in  $\text{DMSO-}d_6$

Figure S4 HSQC spectrum of pheharmine A in  $\text{DMSO-}d_6$

Figure S5 HMBC spectrum of pheharmine A in  $\text{DMSO-}d_6$

Figure S6  $^1\text{H-}^1\text{H}$  COSY spectrum of pheharmine A in  $\text{DMSO-}d_6$

Figure S7 NOESY spectrum of pheharmine A in  $\text{DMSO-}d_6$

Figure S8 HRESIMS spectrum of pheharmine A

**Figure S9** UV spectrum of pheharmine A in MeOH

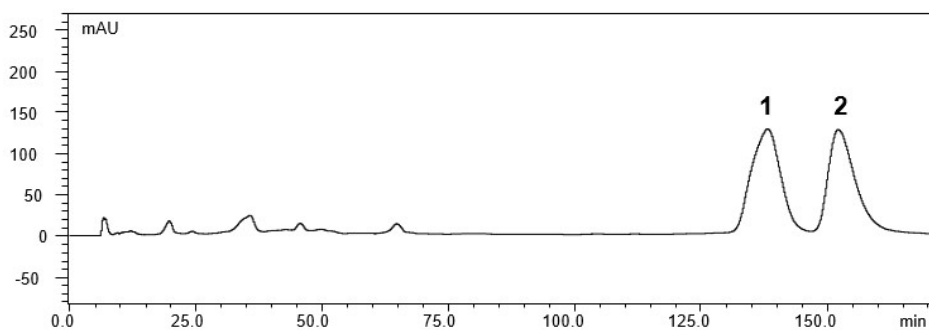

**Figure S10** Chiral HPLC separation profile of 1/2

**Figure S11** Experimental ECD spectrum of (+)-pheharmine A (**1**) in MeOH

**Figure S12** Experimental ECD spectrum of (-)-pheharmine A (**2**) in MeOH

### Spectra of pheharmine B

**Figure S13**  $^1\text{H}$  NMR spectrum (600 MHz) of pheharmine B in  $\text{DMSO-}d_6$

**Figure S14**  $^{13}\text{C}$  NMR spectrum (150 MHz) of pheharmine B in  $\text{DMSO-}d_6$

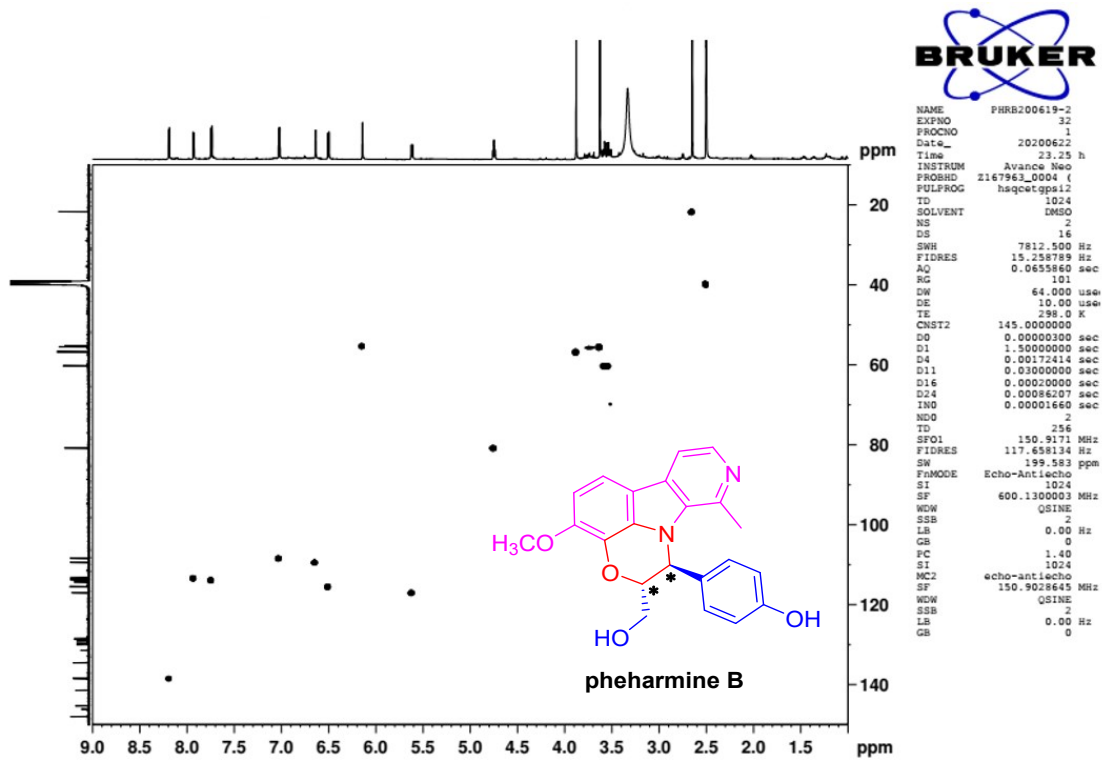

**Figure S15** HSQC spectrum of pheharmine B in DMSO- $d_6$

**Figure S16** HMBC spectrum of pheharmine B in DMSO- $d_6$

**Figure S17**  $^1\text{H}$ - $^1\text{H}$  COSY spectrum of pheharmine B in DMSO- $d_6$

**Figure S18** NOESY spectrum of pheharmine B in DMSO- $d_6$

**Figure S19** HRESIMS spectrum of pheharmine B

# Spectrum Peak Pick Report

FIELD FIELD TEXT

Data Set: 没有

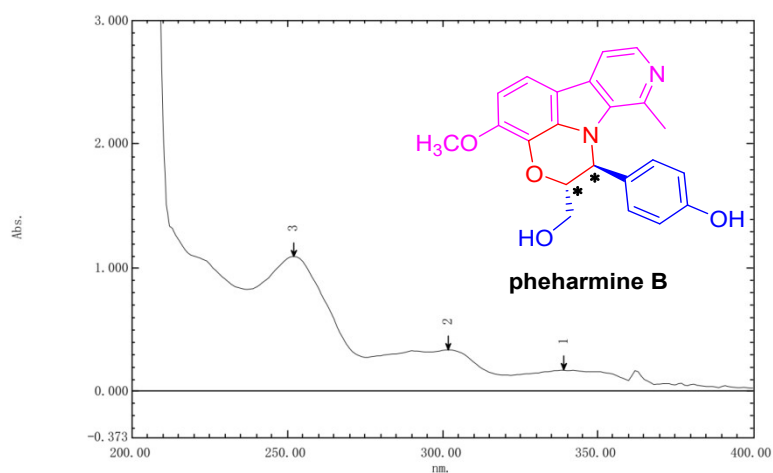

测定属性  
 波长范围 (nm.): 200.00到400.00  
 扫描速度: 中速  
 采样间隔: 1.0  
 自动采样间隔: 停用  
 扫描模式: 单一的

| No. | P/V | Wavelength | Abs.  | 描述 |
|-----|-----|------------|-------|----|
| 1   | ●   | 339.00     | .167  |    |
| 2   | ●   | 302.00     | .333  |    |
| 3   | ●   | 252.00     | 1.091 |    |
| 4   | ●   | 322.00     | .128  |    |
| 5   | ●   | 275.00     | .272  |    |
| 6   | ●   | 237.00     | .824  |    |

试样准备属性  
 重量:  
 体积:  
 稀释:  
 光程长:  
 附加信息:

仪器属性  
 仪器类型: UV-1700  
 测定方式: 吸收值  
 狭缝宽: 1.0 nm  
 光源改变波长: 360.0 nm  
 S/R 转换: 标准

附件属性  
 附件: 无

FIELD TEXT

Figure S20 UV spectrum of pheharmine B in MeOH

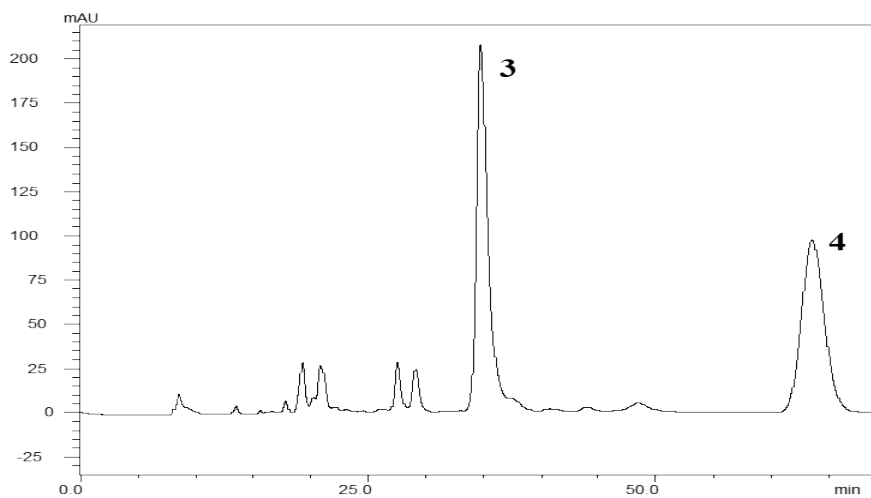

Figure S21 Chiral HPLC separation profile of 3/4

**Figure S22** Experimental ECD spectrum of (-)-pheharmine B (**3**) in MeOH

**Figure S23** Experimental ECD spectrum of (+)-pheharmine B (**4**) in MeOH
